# Supplementary material for: First-principles calculation on the lithium storage properties of high-entropy MXene Ti3C2(N0.25O0.25F0.25S0.25)2
Source: Royal Society of Chemistry journal article supplement (doi:10.1039/d3dt02869k), 2023-01-01
Supplement: d3dt02869k1.pdf [file d3dt02869k1.pdf]

## Supporting Information

### **First-principles calculation on the lithium storage properties of high-entropy MXene $\text{Ti}_3\text{C}_2(\text{N}_{0.25}\text{O}_{0.25}\text{F}_{0.25}\text{S}_{0.25})_2$**

*Kechen Li<sup>a,b</sup> Pengiu Hao<sup>a</sup> Qian zhang<sup>\*,a,b</sup> Jianbo Zhang<sup>a</sup> Sxdorox Dmytro<sup>a</sup>*

*Yang Zhou<sup>\*,a,b</sup>*

*(<sup>a</sup> Faculty of Materials Metallurgy and Chemistry, Jiangxi University of Science and  
Technology, Ganzhou 341000, PR China*

*(<sup>b</sup> Yichun Lithium New Energy Industry Research Institute, Jiangxi University of  
Science and Technology, Ganzhou 341000, PR China)*

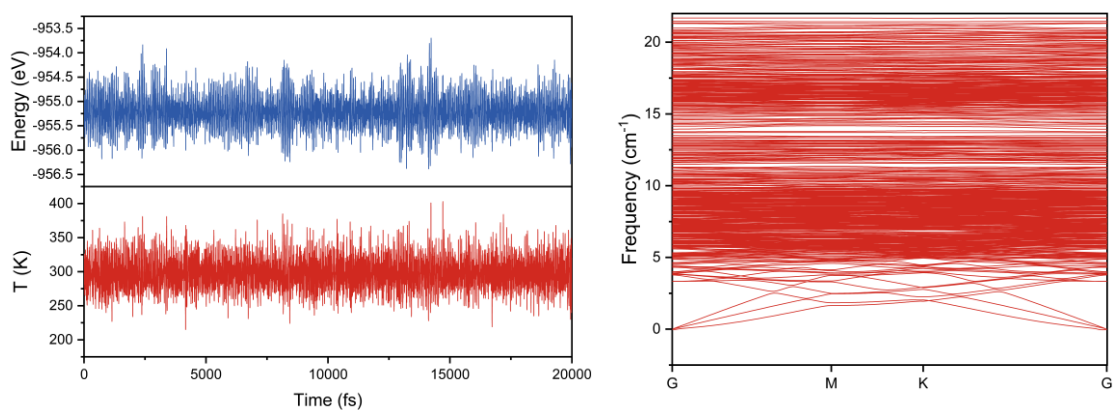

Fig. S1 (a) AIMD simulation of the total energy and temperature profiles of  $\text{Ti}_3\text{C}_2(\text{N}_{0.25}\text{O}_{0.25}\text{F}_{0.25}\text{S}_{0.25})_2$  monolayer at 300K. (b) Phonon dispersion spectra of  $\text{Ti}_3\text{C}_2(\text{N}_{0.25}\text{O}_{0.25}\text{F}_{0.25}\text{S}_{0.25})_2$  monolayer.

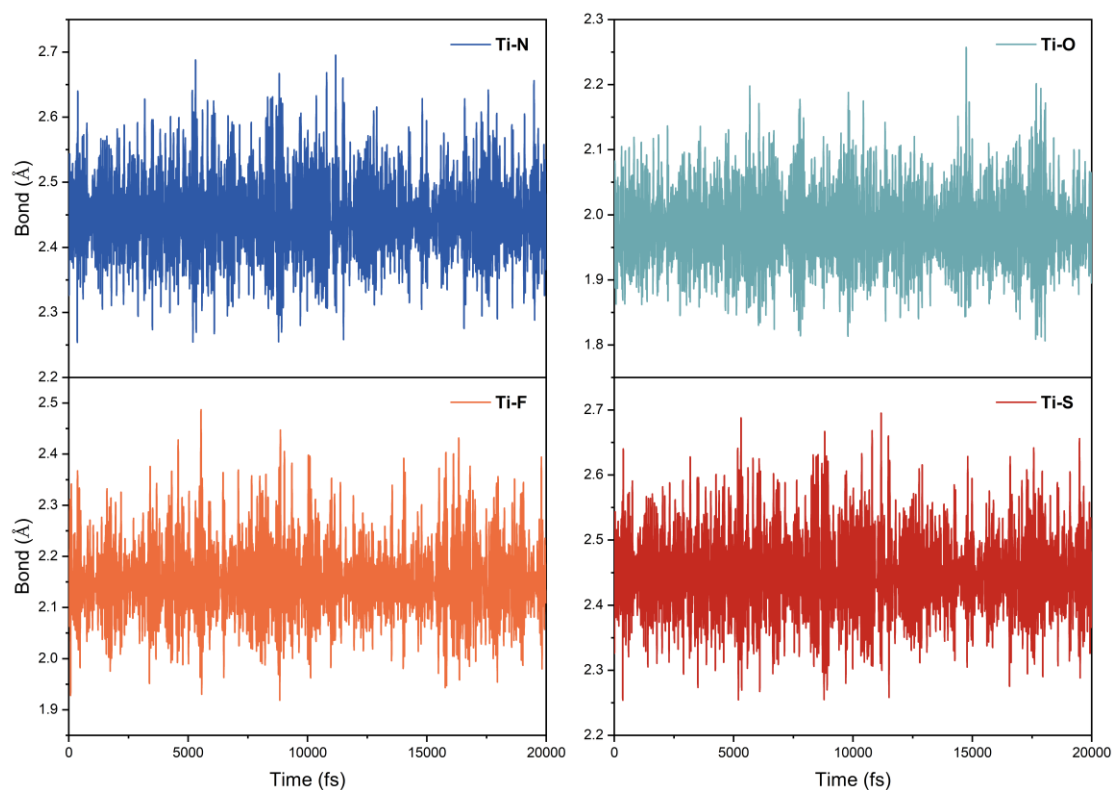

Fig. S2 AIMD simulation of the Ti-N, Ti-O, Ti-F, and Ti-S bonds of  $\text{Ti}_3\text{C}_2(\text{N}_{0.25}\text{O}_{0.25}\text{F}_{0.25}\text{S}_{0.25})_2$  monolayer with their length change at 300K.

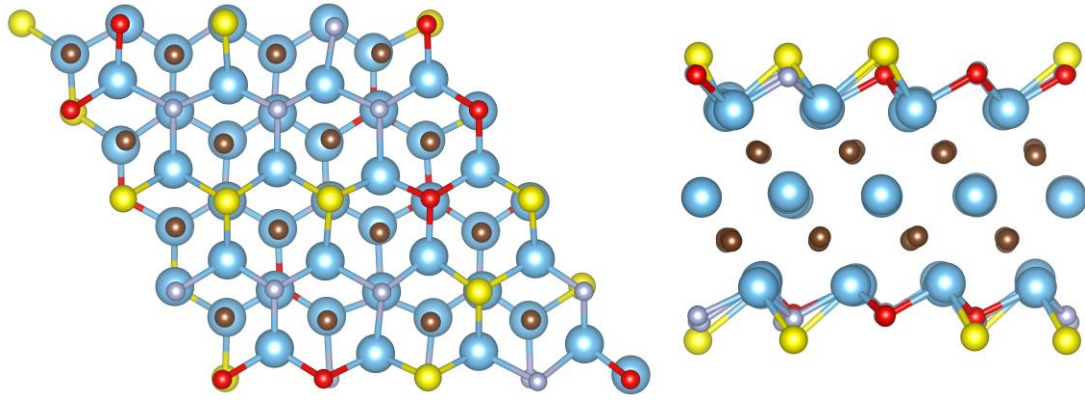

Fig. S3 Schematic diagram of material structure after AIMD simulation at 300K temperature.

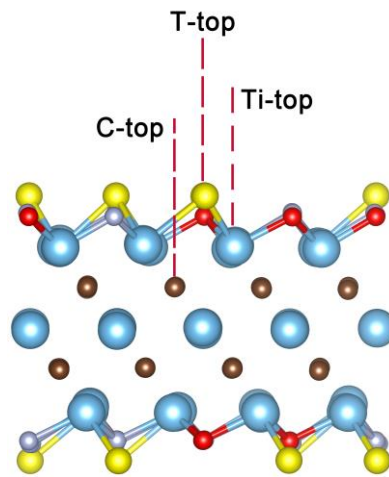

Fig. S4 Side view of the possible adsorption sites for Li-ion on  $\text{Ti}_3\text{C}_2(\text{N}_{0.25}\text{O}_{0.25}\text{F}_{0.25}\text{S}_{0.25})_2$  surface.

Table S1 The adsorption energy at the adsorption position of A-side and the corresponding charge transfer of the Li atom

| Adsorption site | Adsorption Energy (eV) | q (e) |
|-----------------|------------------------|-------|
| C1              | -2.62                  | -0.88 |
| C2              | -2.40                  | -0.88 |
| C3              | -2.47                  | -0.88 |
| C4              | -2.30                  | -0.90 |
| C5              | -2.35                  | -0.89 |
| C6              | -2.52                  | -0.88 |
| C7              | -2.45                  | -0.88 |
| C8              | -2.42                  | -0.89 |
| C9              | -2.64                  | -0.87 |
| C10             | -2.66                  | -0.87 |
| C11             | -2.46                  | -0.89 |
| C12             | -2.49                  | -0.88 |
| C13             | -2.86                  | -0.87 |
| C14             | -2.62                  | -0.88 |
| C15             | -2.25                  | -0.88 |
| C16             | -2.49                  | -0.88 |
| Ti1             | →C1                    | -     |
| Ti2             | →C6                    | -     |
| Ti3             | -2.19                  | -0.88 |
| Ti4             | →C1                    | -     |
| Ti5             | -2.25                  | -0.88 |
| Ti6             | -2.50                  | -0.89 |
| Ti7             | -2.31                  | -0.89 |
| Ti8             | -2.40                  | -0.89 |
| Ti9             | →C13                   | -     |
| Ti10            | -2.46                  | -0.89 |
| Ti11            | -2.46                  | -0.89 |
| Ti12            | →C9                    | -0.87 |
| Ti13            | -2.37                  | -0.90 |
| Ti14            | →C14                   | -0.89 |
| Ti15            | -2.20                  | -0.89 |
| Ti16            | →C13                   | -     |

Table S2 The adsorption energy at the adsorption position of B-side and the corresponding charge transfer of the Li atom

| Adsorption site | Adsorption Energy (eV) | q (e) |
|-----------------|------------------------|-------|
| C1              | -2.35                  | -0.89 |
| C2              | -2.01                  | -0.90 |
| C3              | -2.68                  | -0.88 |
| C4              | -2.69                  | -0.87 |
| C5              | -2.76                  | -0.87 |
| C6              | -2.58                  | -0.88 |
| C7              | -2.56                  | -0.88 |
| C8              | -2.70                  | -0.87 |
| C9              | -2.58                  | -0.89 |
| C10             | -3.16                  | -0.86 |
| C11             | -2.76                  | -0.88 |
| C12             | -2.57                  | -0.88 |
| C13             | -2.11                  | -0.89 |
| C14             | -2.44                  | -0.89 |
| C15             | -2.98                  | -0.87 |
| C16             | -2.56                  | -0.88 |
| Ti1             | -2.49                  | -0.88 |
| Ti2             | -2.11                  | -0.91 |
| Ti3             | -2.17                  | -0.90 |
| Ti4             | -2.63                  | -0.89 |
| Ti5             | -2.57                  | -0.89 |
| Ti6             | →C10                   | -     |
| Ti7             | →C11                   | -     |
| Ti8             | -2.70                  | -0.87 |
| Ti9             | →C9                    | -     |
| Ti10            | →C10                   | -     |
| Ti11            | -2.55                  | -0.90 |
| Ti12            | →C11                   | -     |
| Ti13            | -2.14                  | -0.89 |
| Ti14            | -1.92                  | -0.91 |
| Ti15            | →C15                   | -     |
| Ti16            | →C15                   | -     |
